# Supplementary material
Source: Royal Society of Chemistry journal article supplement (doi:10.1039/d6cc01054g)
Supplement: d6cc01054g1.pdf [file d6cc01054g1.pdf]

## Supporting Information

### Construction of a Cd<sub>6</sub>Eu<sub>4</sub>-containing coordination polymer for luminescence detection of ketoprofen as anti-inflammatory drug

Jinshuai Song, Shuhan Zhang, Shiqing Wang, Desmond Schipper, and Xiaoping Yang

#### Contents

|                                                                                                              |    |
|--------------------------------------------------------------------------------------------------------------|----|
| 1. General Procedures .....                                                                                  | 2  |
| 2. Synthesis of H <sub>2</sub> L and <b>1</b> .....                                                          | 3  |
| 3. <sup>1</sup> H NMR spectrum of H <sub>2</sub> L.....                                                      | 4  |
| 4. IR spectra of H <sub>2</sub> L and <b>1</b> .....                                                         | 4  |
| 5. Repeating Cd <sub>6</sub> Eu <sub>4</sub> unit and 1-D coordination polymeric structure of <b>1</b> ..... | 5  |
| 6. Coordination mode of H <sub>2</sub> L and intermolecular hydrogen bonds formed in <b>1</b> .....          | 5  |
| 7. Characterization of <b>1</b> .....                                                                        | 6  |
| 8. UV-vis absorption spectra of H <sub>2</sub> L and <b>1</b> .....                                          | 6  |
| 9. Excitation and emission spectra of <b>1</b> before and after the addition of KTP .....                    | 7  |
| 10. The time scan of I <sub>615nm</sub> upon the addition of KTP .....                                       | 7  |
| 11. Lanthanide luminescence spectra of <b>1</b> with the addition of KTP .....                               | 8  |
| 12. Chemical structures of KTP and interferents .....                                                        | 9  |
| 13. Emission spectra of <b>1</b> with the addition of interferents.....                                      | 10 |
| 14. CIE diagram of <b>1</b> with the addition of KTP .....                                                   | 13 |
| 15. Luminescence response of <b>1</b> to KTP in FCS and urine .....                                          | 13 |
| 16. UV-vis titration of <b>1</b> to the addition of KTP .....                                                | 14 |
| 17. Emission spectrum of KTP at 77K.....                                                                     | 14 |
| 18. Emission spectra of <b>1</b> and the Gd(III) analogue with the addition of KTP.....                      | 15 |
| 19. Lanthanide luminescence lifetimes of <b>1</b> with the addition of KTP.....                              | 16 |
| 20. High-resolution XPS spectra of <b>1</b> .....                                                            | 17 |
| 21. X-Ray Crystallography .....                                                                              | 18 |

## 1. General Procedures

All chemicals and solvents were purchased from commercial sources. IR spectra were recorded using a Nicolet IS50 spectrometer. The sample is under a N<sub>2</sub> flow of 200 mL min<sup>-1</sup>, and heated from room temperature to 900°C with a heating rate of 5°C min<sup>-1</sup>; Elemental analysis was performed on a EURO EA3000 with the solid sample after dried in the oven at 110°C for six hours. The morphology of the sample was analyzed by Nova 200 NanoSEM scanning electron microscope (SEM) and an attached energy-dispersive x-ray spectrometer (EDX). The X-ray photoelectron spectroscopy (XPS) was performed on PHI5000 Versaprobe system. Molecular docking calculation was conducted by AutoDock Vina program.

**Photophysical Studies.** UV-vis absorption spectra were obtained on a UV-3600 spectrophotometer. Visible spectra were recorded on a FLS 980 fluorimeter. The light source for the spectra was a 450 W xenon arc lamp with continuous spectral distribution from 190 to 2600 nm. The temporal decay curves of the fluorescence signals were stored by using the attached storage digital oscilloscope. Systematic errors have been deducted through the standard instrument corrections. All the measurements were carried out at room temperature.

**Sensing experiments to KTP.** The ground powder of **1** was dispersed in CH<sub>3</sub>CN, and then sonicated for one hour to form homogeneous suspension of **1** (0.04 mg/mL). A quartz cell (sizes: 4.5 cm × 1.2 cm × 1.2 cm) was used in the sensing experiments. KTP in CH<sub>3</sub>CN was added by a pipet with concentrations from 10 to 120 μM. Purchased FCS was diluted to 1% using PBS buffer solution (pH = 7.4) before the experiments. The KTP drug was dissolved in the PBS buffer solution. For the smartphone-based detection of KTP, a common smartphone (Redmi Note 12 Turbo) installed Color Picker APP was used as signal reader and analyzer. It is able to convert image color signals to digital format representing green (G), red (R) and blue (B) color by region of interest (ROI) averaging algorithm. The camera parameters such as ISO speed (5482), exposure time (1/15 s) and focus (24 mm) are fixed during the experiments. The samples in the quartz cell were placed in a commercial UV light box (ZF-20D Dark Box Type Ultraviolet Analyzer, sizes: 27 × 23 × 25 cm). The UV lamp is 6 cm directly above the quartz cell, and the light wavelength and power are 254 nm and 24 W, respectively. The shooting distance between the cell and camera is 10 cm.

## 2. Synthesis of H<sub>2</sub>L and 1

**Synthesis of H<sub>2</sub>L:** 3,4,5-trimethoxybenzaldehyde (3.92 g, 20 mmol) was dissolved in 20 mL of EtOH, and a solution of ethanedioic dihydrazide (1.18 g, 10 mmol) in 20 mL of EtOH was then added. The mixture was heated and stirred under reflux for 5 hrs. After cooling, the solution was filtered in vacuum to give white solid product (Scheme 2). It was washed with EtOH three times (5 mL per time), and dried in air for one day. Yield: 2.28 g (48%). <sup>1</sup>H NMR data in DMSO-*d*<sub>6</sub> (ppm): 12.29 (s, 2H), 8.55 (s, 2H), 7.03 (s, 4H), 3.86 (s, 12H), 3.74 (s, 6H). IR (KBr, cm<sup>-1</sup>): 3455 (br, m), 3416 (w), 3036 (w), 2934 (w), 2829 (w), 1622 (s), 1576 (m), 1537 (m), 1502 (m), 1459 (m), 1415 (m), 1323 (s), 1214 (s), 1128 (s), 1064 (m), 1002 (m), 834 (m), 703 (w), 633 (w), 523 (w), 470 (w).

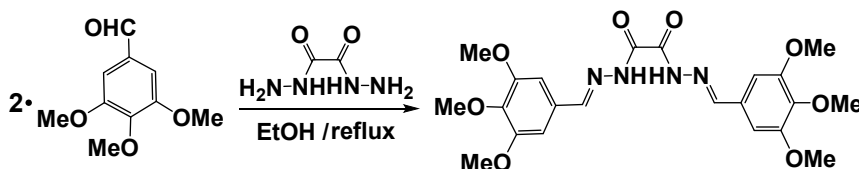

**Scheme S1.** Synthesis route of H<sub>2</sub>L.

**Synthesis of 1:** EuCl<sub>3</sub>·6H<sub>2</sub>O (0.0733 g, 0.20 mmol), Cd(OAc)<sub>2</sub>·2H<sub>2</sub>O (0.0533 g, 0.20 mmol) and H<sub>2</sub>L (0.0949 g, 0.20 mmol) were dissolved in 10 mL of DMF and EtOH (1:1) at room temperature, and 1 mL of triethylamine solution (1.0 mol/L) in EtOH was added. The mixed solution was stirred and heated under reflux for 20 minutes, and then filtered. The pale yellow crystals of **1** were obtained after two weeks by diffusing diethyl ether into the filtrate, and then collected. The crystalline product was dried in the oven at 110°C for six hours. Yield: 0.0265 g (22.21%, based on Cd(OAc)<sub>2</sub>·2H<sub>2</sub>O). Elemental analysis: C<sub>78</sub>H<sub>130</sub>Cd<sub>6</sub>Cl<sub>12</sub>N<sub>14</sub>O<sub>38</sub>Eu<sub>4</sub>: C, 26.17; H, 3.66; N, 5.48 %. Found: C, 26.09; H, 3.79; N, 5.60 %. FT-IR (KBr, ν/cm<sup>-1</sup>): 3480 (br, s), 2942 (br, w), 1581 (s), 1551 (s), 1505 (m), 1453 (s), 1421 (s), 1333 (m), 1241 (m), 1157 (w), 1127 (s), 999 (br, w), 837 (w), 675 (w), 540 (br, w).

### 3. $^1\text{H}$ NMR spectrum of $\text{H}_2\text{L}$

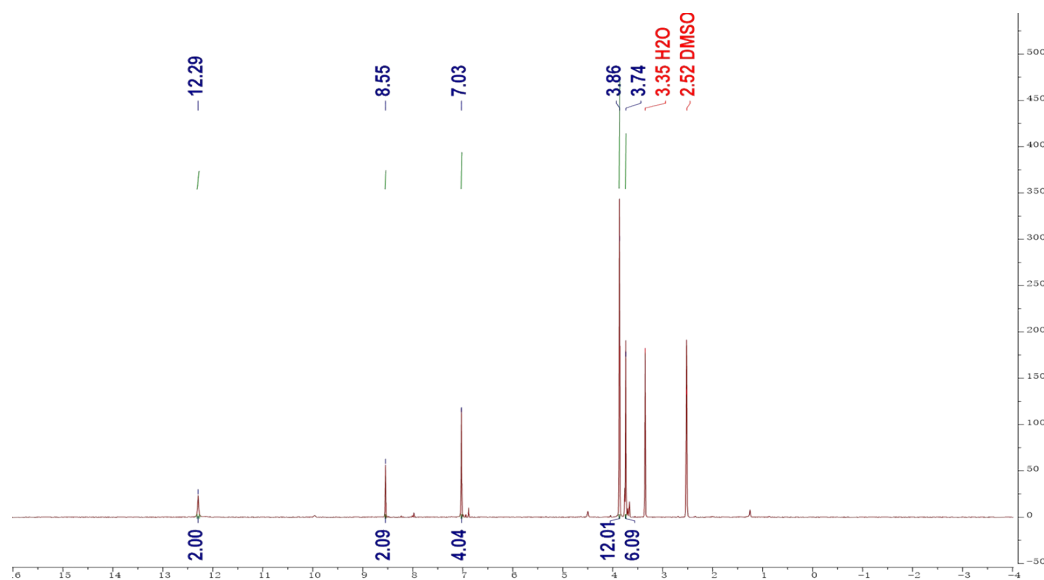

Figure S1.  $^1\text{H}$  NMR spectrum of  $\text{H}_2\text{L}$  in  $\text{DMSO-d}_6$ .

### 4. IR spectra of $\text{H}_2\text{L}$ and 1

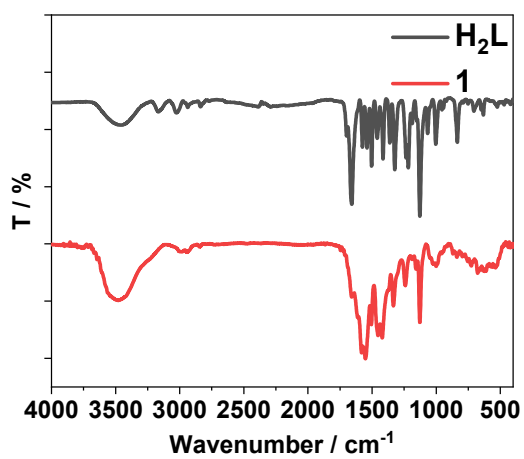

Figure S2. IR spectra of  $\text{H}_2\text{L}$  and 1.

## 5. Repeating $\text{Cd}_6\text{Eu}_4$ unit and 1-D coordination polymeric structure of **1**

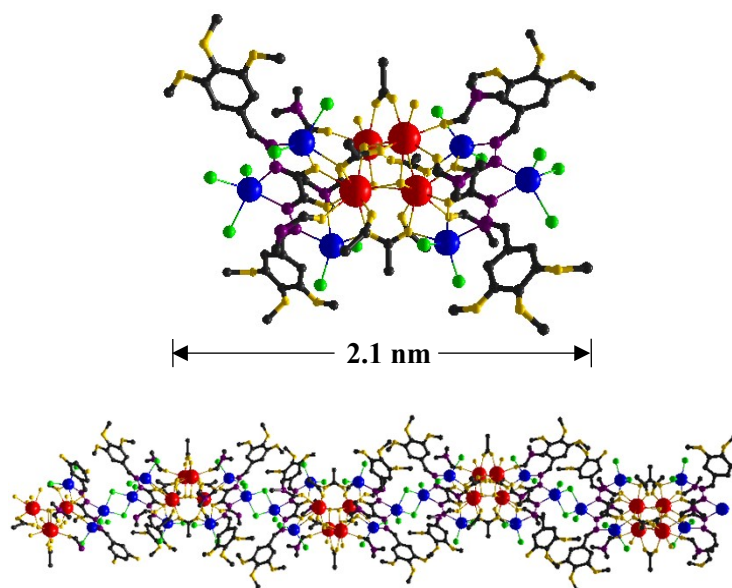

**Figure S3.** Repeating  $\text{Cd}_6\text{Eu}_4$  unit and 1-D coordination polymeric structure of **1**.

## 6. Coordination mode of $\text{H}_2\text{L}$ and intermolecular hydrogen bonds formed in **1**

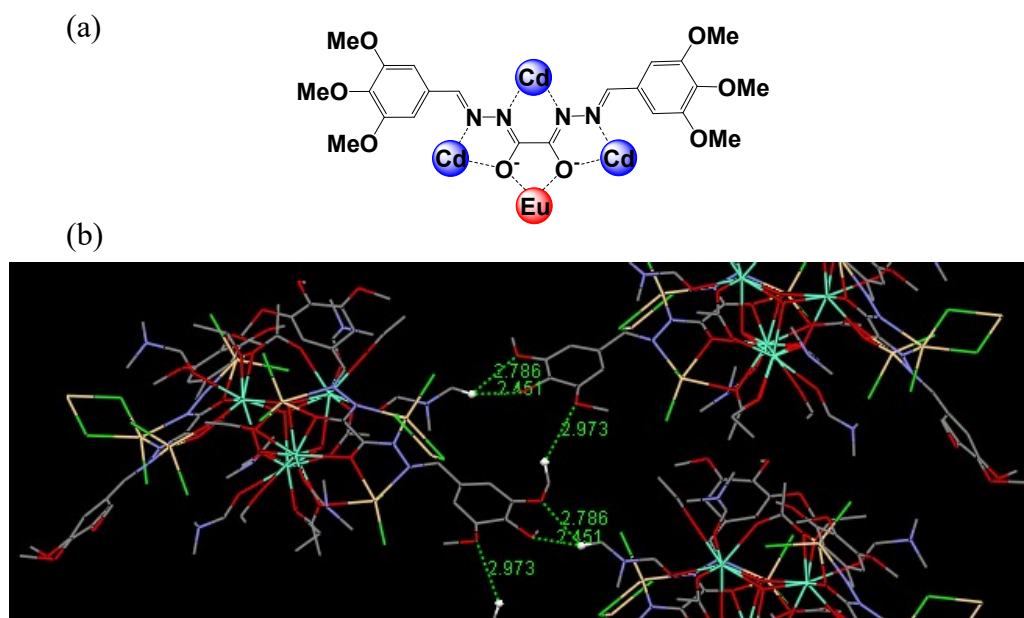

**Figure S4.** (a) Coordination mode of  $\text{H}_2\text{L}$  in **1**; (b) Intermolecular hydrogen bonds formed between H atoms of DMF (or  $-\text{OCH}_3$  groups of  $\text{L}^{2-}$ ) and O atoms of  $-\text{OCH}_3$  groups from  $\text{L}^{2-}$  ( $\text{H}\cdots\text{O}$  distances: 2.451 Å, 2.786 Å, and 2.973 Å) in **1**.

## 7. Characterization of **1**

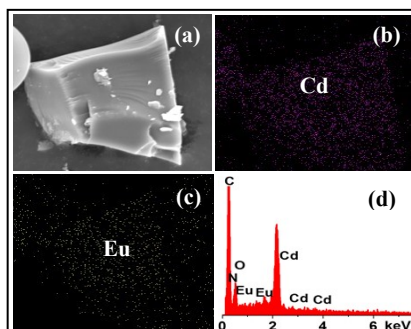

**Figure S5.** SEM image (a), elemental maps of Cd (b) and Eu (c), and EDX spectrum (d) of **1**.

## 8. UV-vis absorption spectra of H<sub>2</sub>L and **1**

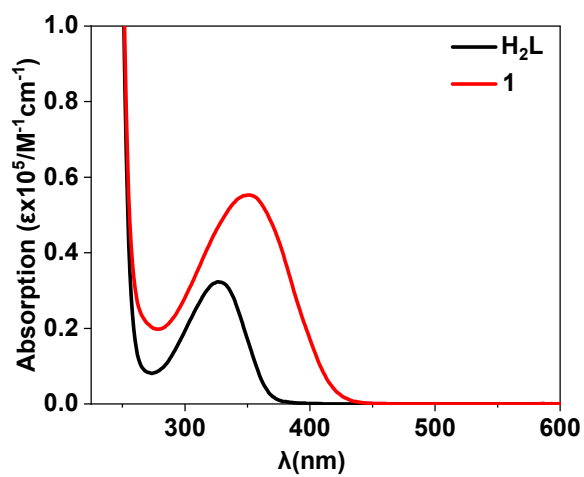

**Figure S6.** The UV-vis absorption spectra of H<sub>2</sub>L and **1** in CH<sub>3</sub>CN. ( $C = 10 \mu\text{M}$ ).

## 9. Excitation and emission spectra of **1** before and after the addition of KTP

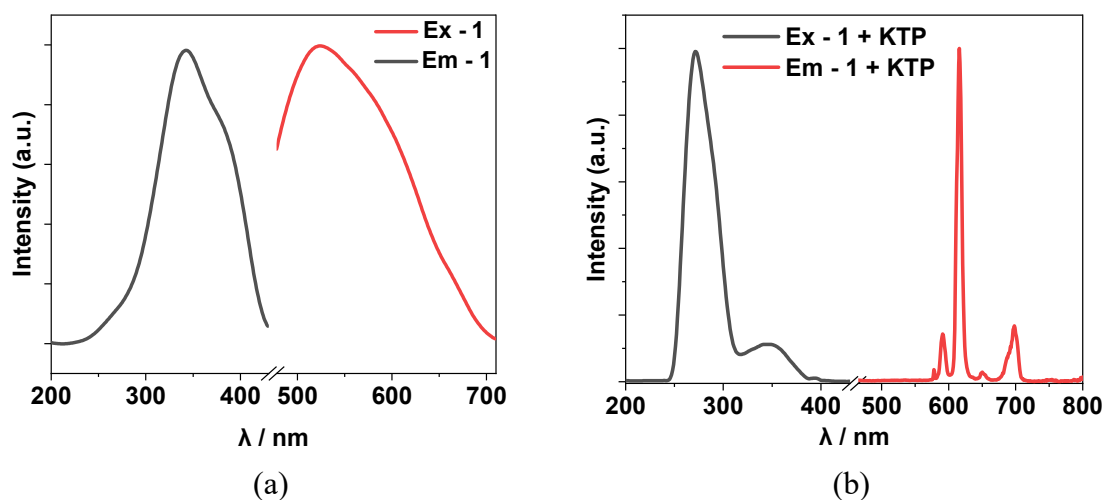

**Figure S7.** The excitation and emission spectra of **1** in CH<sub>3</sub>CN: (a) Before the addition of KTP ( $\lambda_{\text{em}} = 525$  nm,  $\lambda_{\text{ex}} = 340$  nm); (b) After the addition of 100  $\mu\text{M}$  KTP ( $\lambda_{\text{em}} = 615$  nm,  $\lambda_{\text{ex}} = 270$  nm).

## 10. The time scan of $I_{615\text{nm}}$ upon the addition of KTP

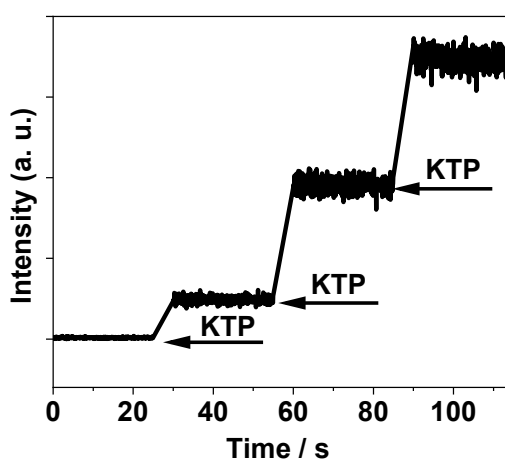

**Figure S8.** The time scan of  $I_{615\text{nm}}$  of **1** in CH<sub>3</sub>CN upon the multiple additions of KTP (33  $\mu\text{M}$  per time).

## 11. Lanthanide luminescence spectra of **1** with the addition of KTP

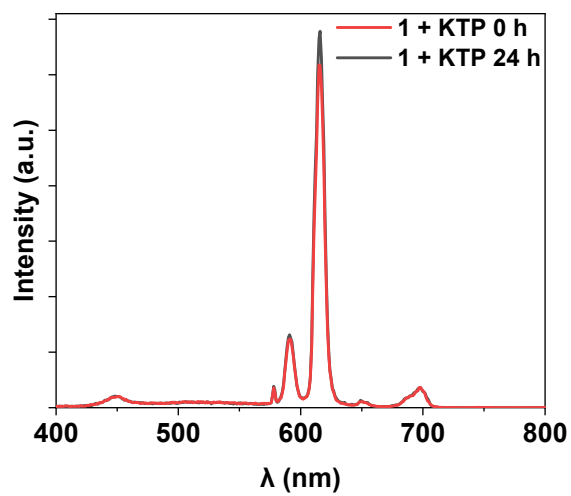

**Figure S9.** The emission spectra (fresh and after 24 hrs) of **1** with the addition of KTP (100 μM) in CH<sub>3</sub>CN. ( $\lambda_{\text{ex}} = 270$  nm)

## 12. Chemical structures of KTP and interferences

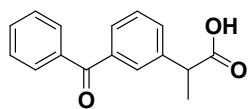

Ketoprofen (KTP)

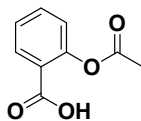

Acetylsalicylic acid (ASA)

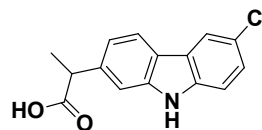

Carprofen (CPF)

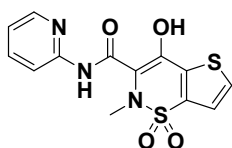

Tenoxicam (TNX)

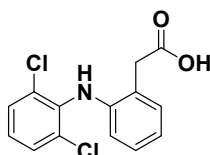

Diclofenac (DCF)

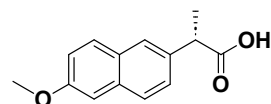

Naproxen (NAP)

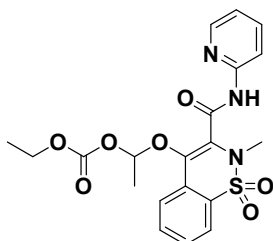

Ampiroxicam (APX)

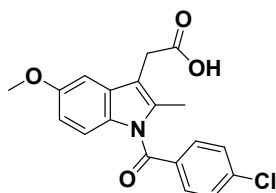

Indometacin (IND)

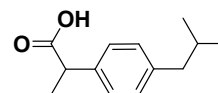

Ibuprofen (IBU)

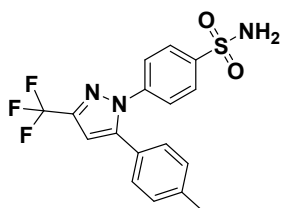

Celecoxib (CXB)

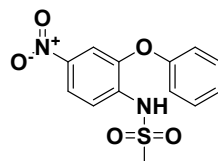

Nimesulide (NIM)

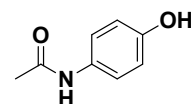

Acetaminophen (ACE)

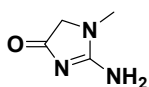

Creatinine (CRE)

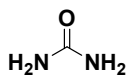

Urea (URE)

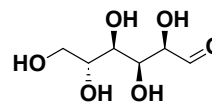

D(+)-Glucose (GLU)

**Scheme S2.** Chemical structures of **KTP** and other interferences.

### 13. Emission spectra of 1 with the addition of interferences

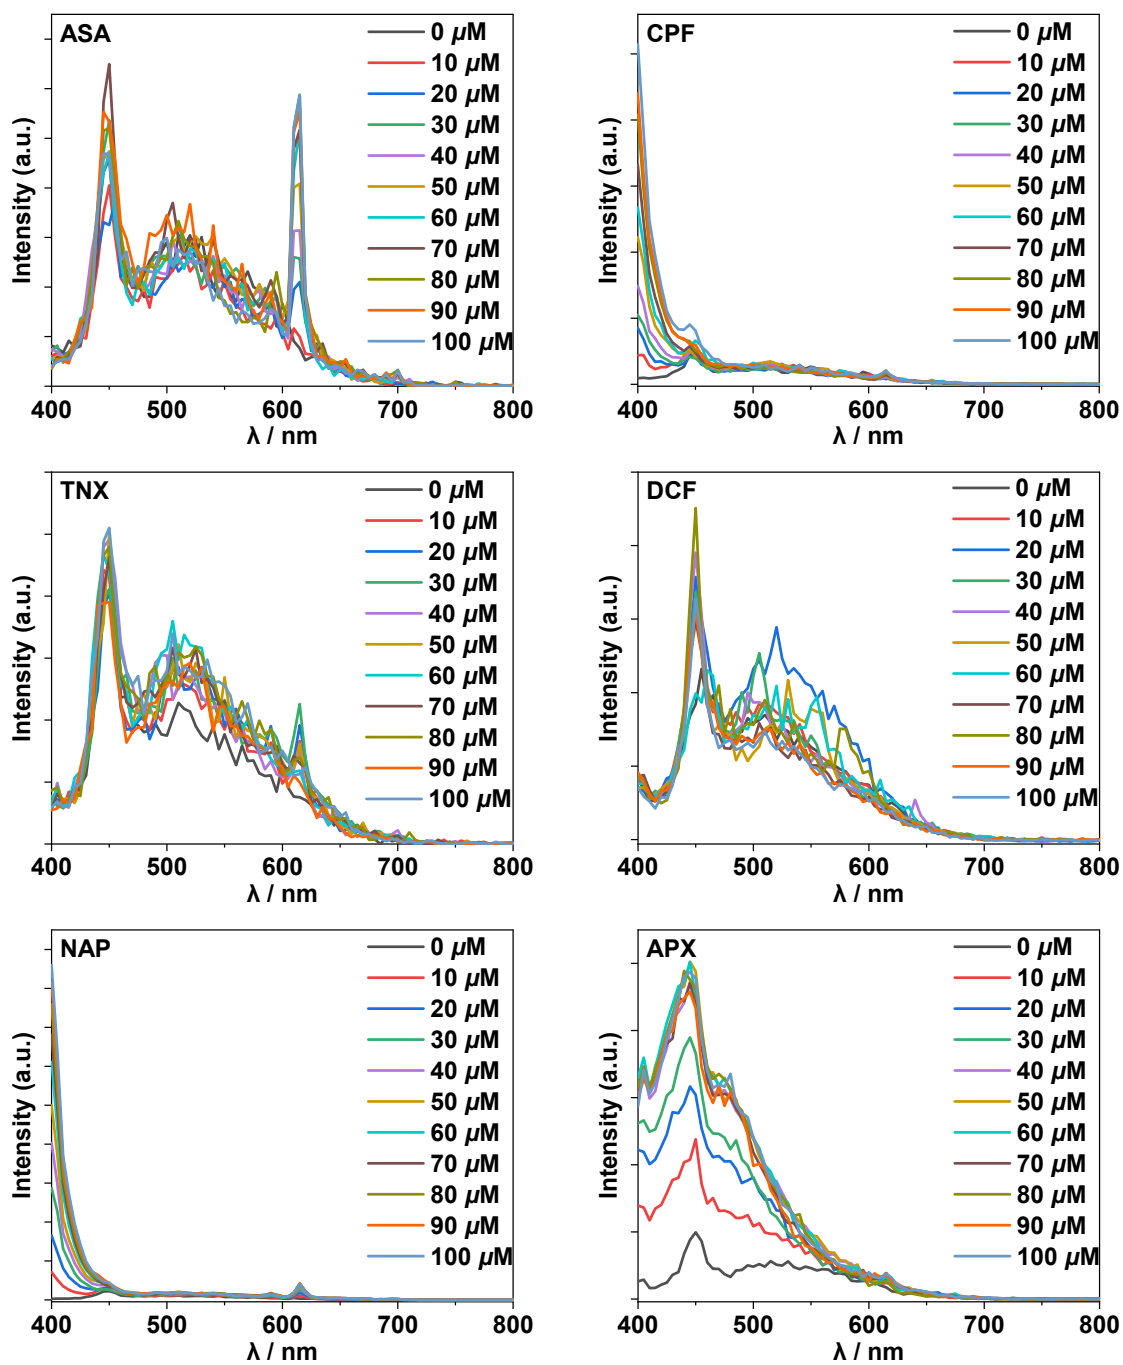

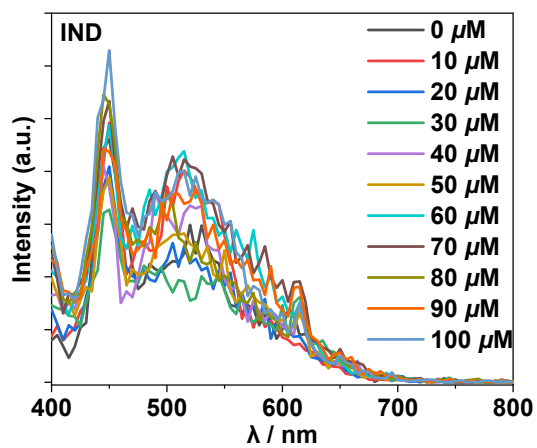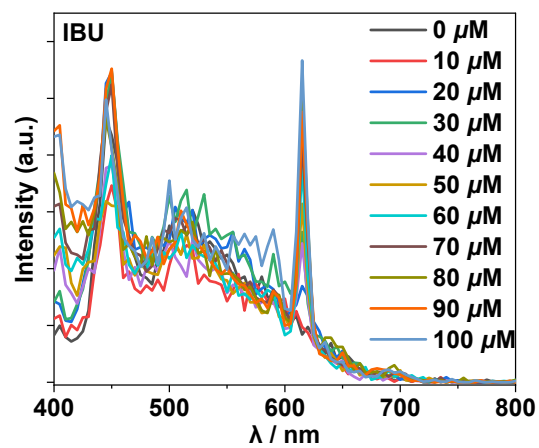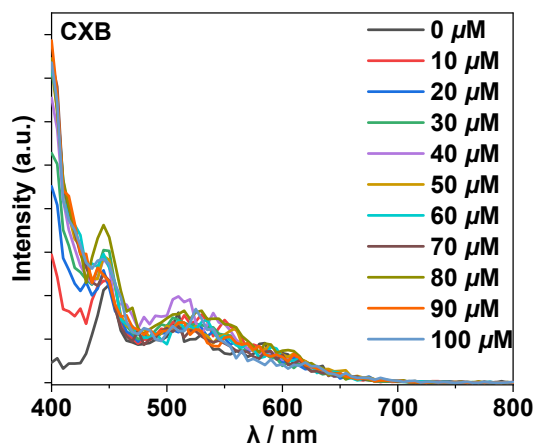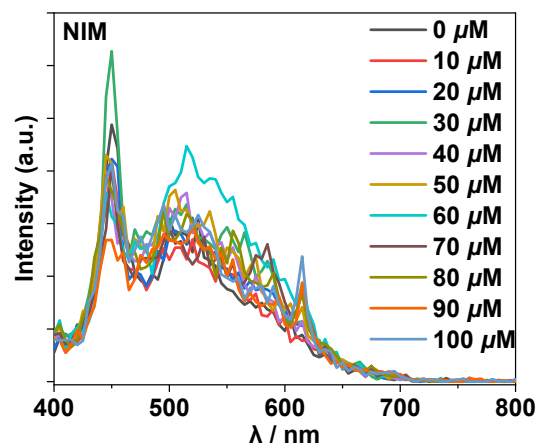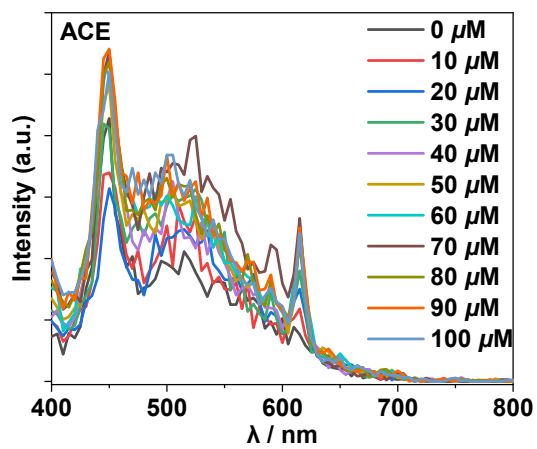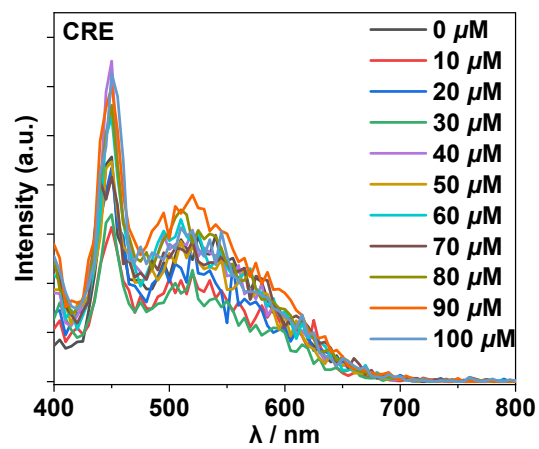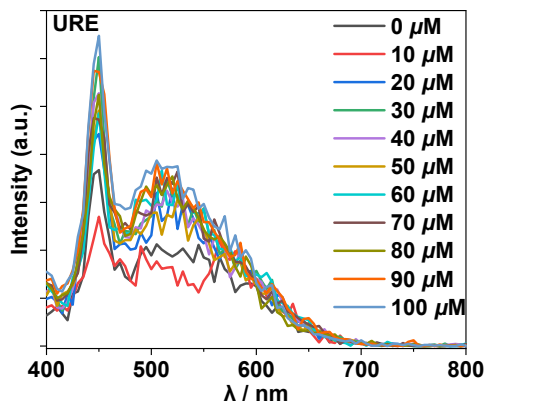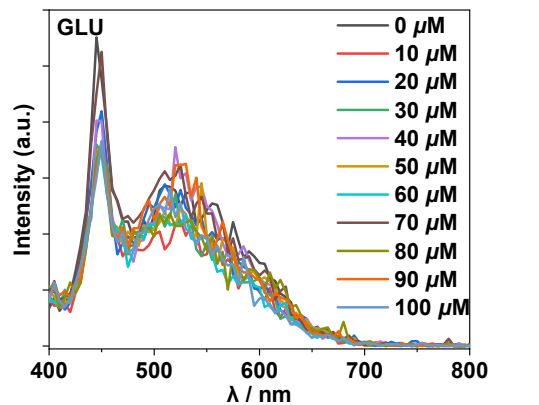

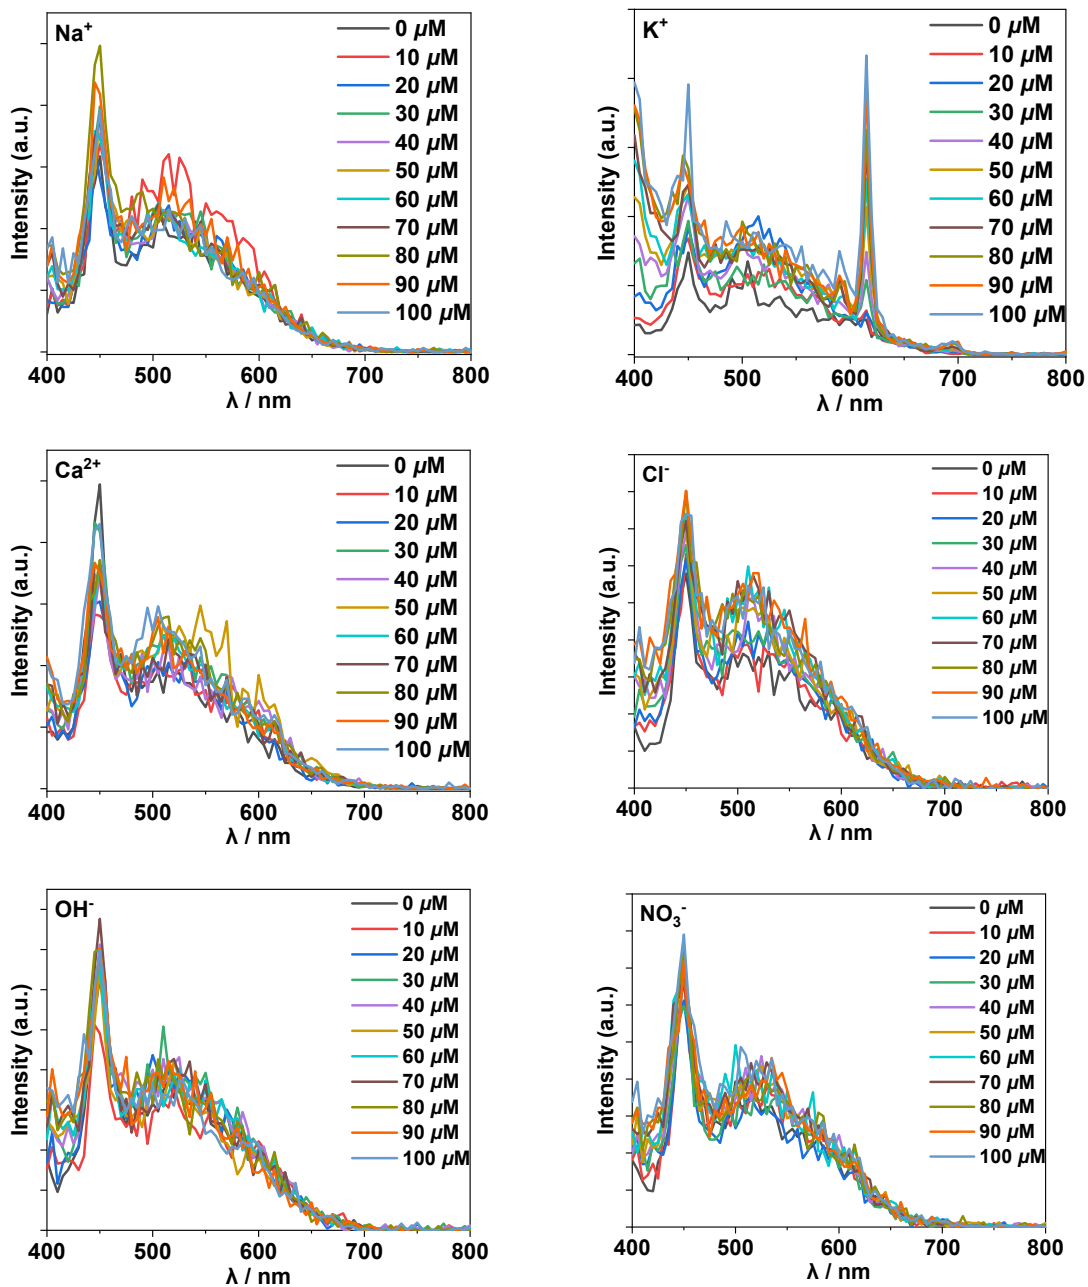

**Figure S10.** Emission spectra of **1** with the addition of interferences in  $\text{CH}_3\text{CN}$ .

#### 14. CIE diagram of 1 with the addition of KTP

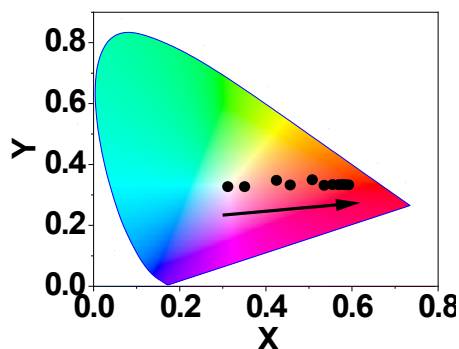

**Figure S11.** Corresponding CIE diagram of 1 with the addition of different concentrations of KTP in Figure 3 in the text.

#### 15. Luminescence response of 1 to KTP in FCS and urine

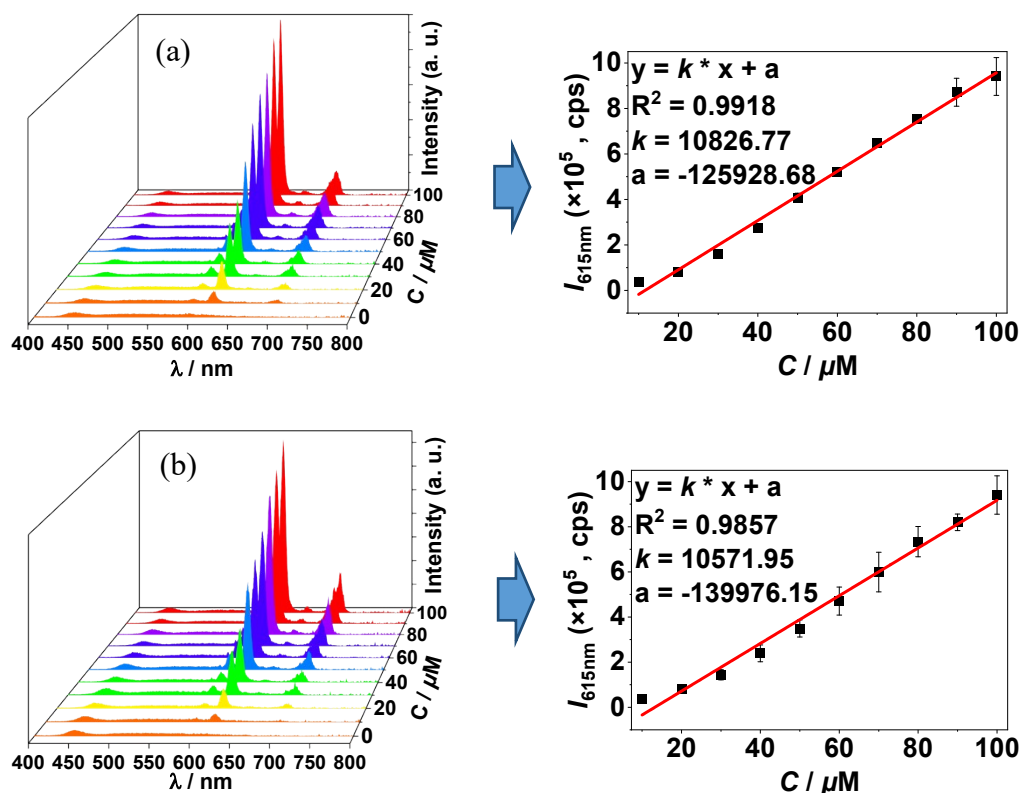

**Figure S12.** Left: The luminescence response of 1 to the addition of different concentrations of KTP in FCS (a) and urine (b). Right: The linear relationships between the luminescence intensities of 1 and the concentrations of KTP. ( $\lambda_{\text{ex}} = 270$  nm)

## 16. UV-vis titration of 1 to the addition of KTP

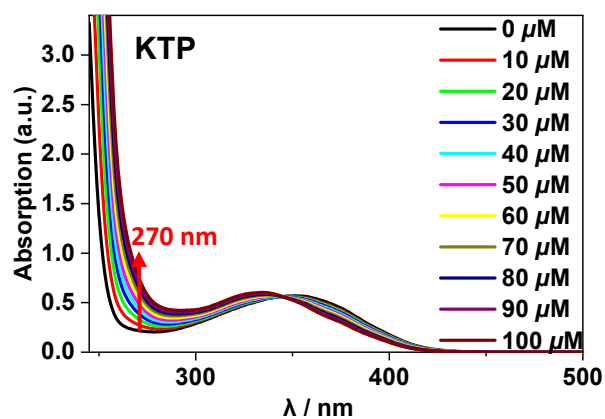

Figure S13. UV-vis titration of 1 to the addition of KTP in  $\text{CH}_3\text{CN}$ .

## 17. Emission spectrum of KTP at 77K

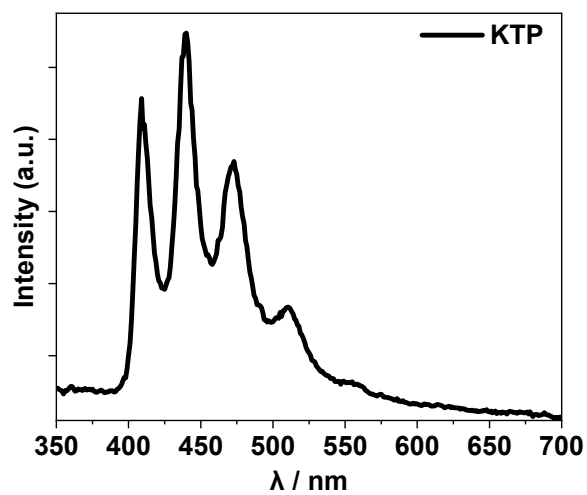

Figure S14. The emission spectrum of KTP at 77K.

## 18. Emission spectra of 1 and the $\text{Gd}(\text{III})$ analogue with the addition of KTP

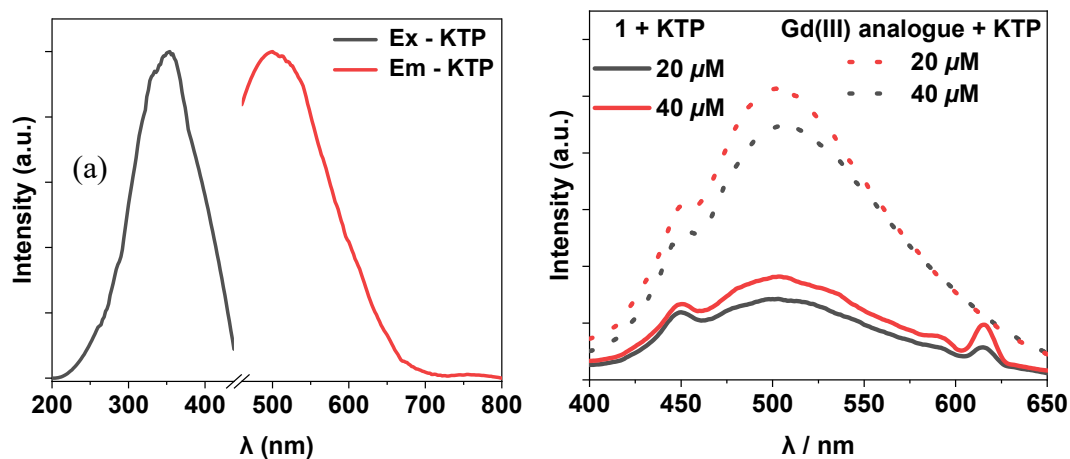

**Figure S15.** (a) The excitation ( $\lambda_{em} = 500$  nm) and emission ( $\lambda_{ex} = 350$  nm) spectra of KTP in  $\text{CH}_3\text{CN}$ ; (b) The emission spectra of **1** (solid lines) and the Gd(III) analogue (dot lines) with the addition of different concentrations of KTP in  $\text{CH}_3\text{CN}$ . ( $\lambda_{ex} = 350$  nm);

## 19. Lanthanide luminescence lifetimes of **1** with the addition of KTP

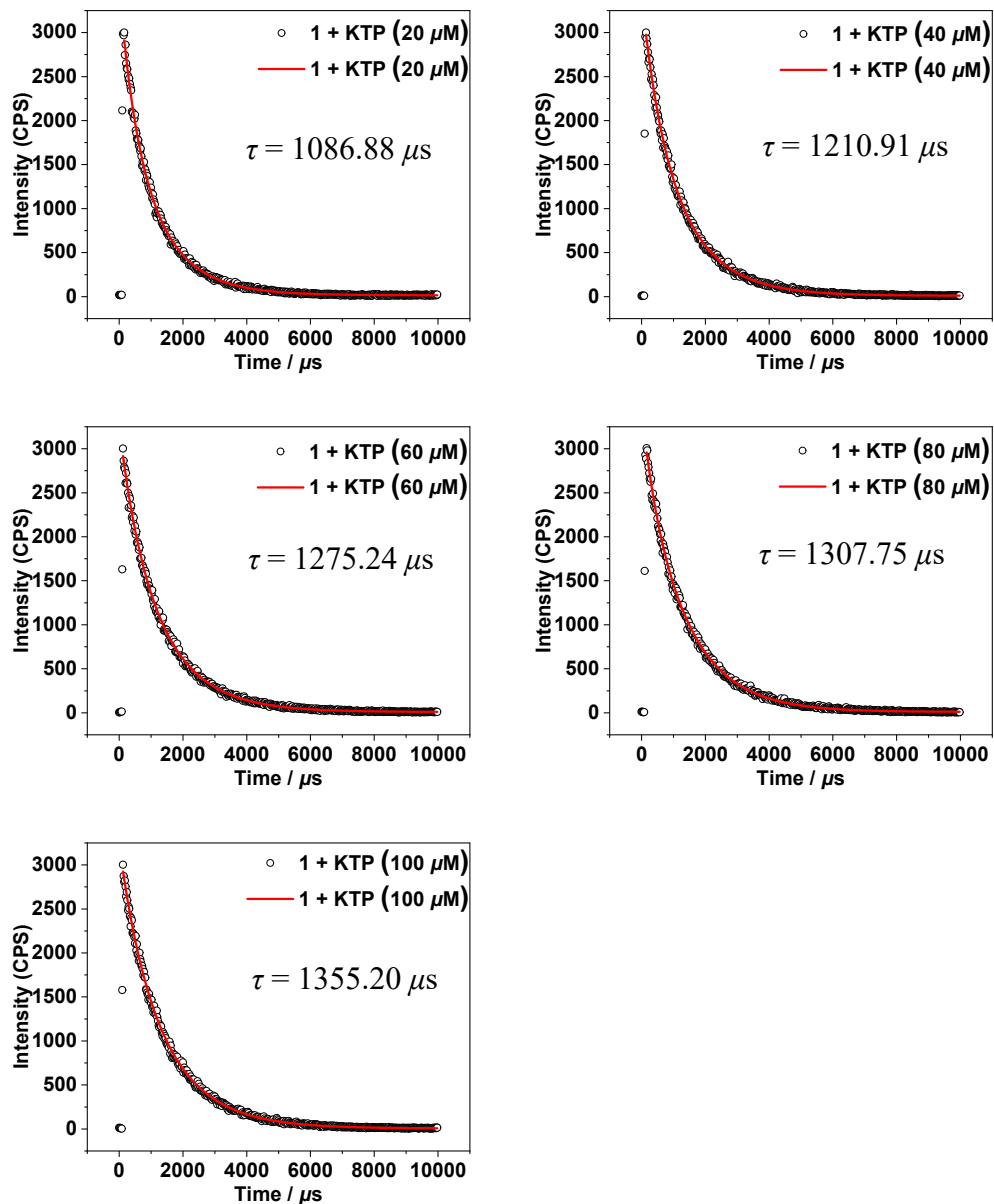

**Figure S16.** The lanthanide luminescence lifetimes of **1** with the addition of different concentrations of KTP in  $\text{CH}_3\text{CN}$ . ( $\lambda_{\text{ex}} = 270 \text{ nm}$ )

## 20. High-resolution XPS spectra of **1**

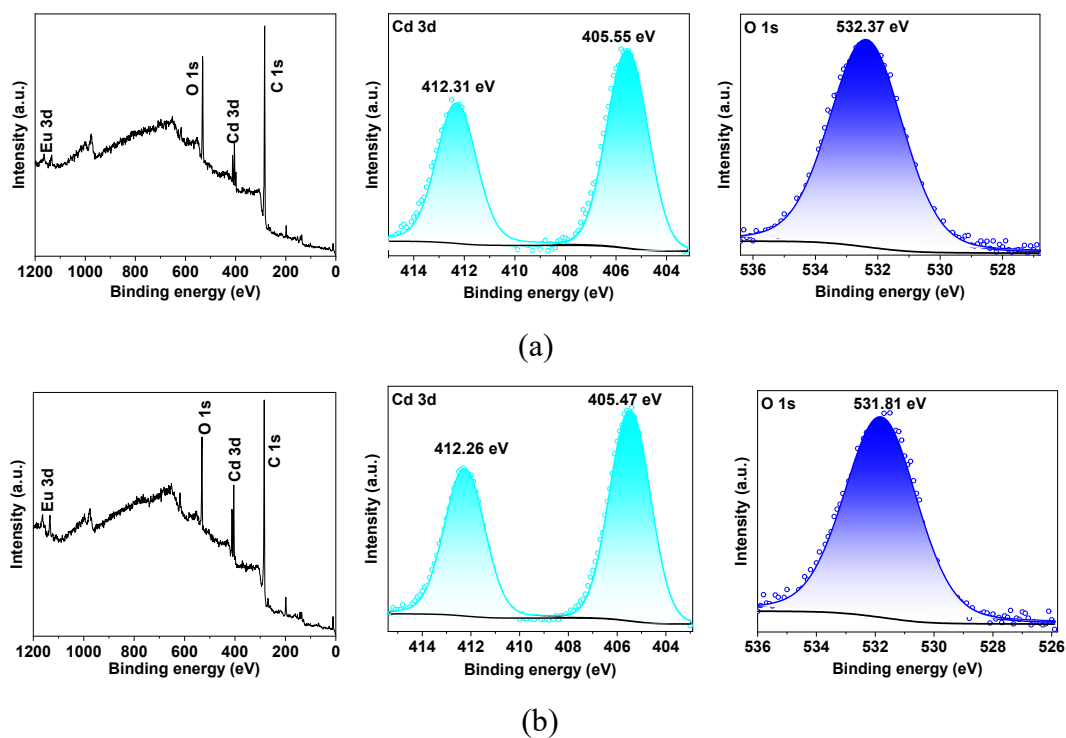

**Figure S17.** XPS spectra of **1** before (a) and after (b) the treatment with KTP.

## 21. X-Ray Crystallography

Data were collected on a Smart APEX CCD diffractometer with graphite monochromated Mo-K $\alpha$  radiation ( $\lambda = 0.71073 \text{ \AA}$ ) at 233 K. The data set was corrected for absorption based on multiple scans and reduced using standard methods.

Data reduction was performed using DENZO-SMN.<sup>1</sup> The structure was solved by Olex2 program. Coordinates of the non-hydrogen atoms were refined anisotropically, while hydrogen atoms were included in the calculation isotropically but not refined. Neutral atom scattering factors were taken from Cromer and Waber.<sup>2</sup> Some uncoordinated solvent molecules such as EtOH and H<sub>2</sub>O were found to be badly disordered. Attempts to model the disorder were unsatisfactory. The contributions to the scattering factors due to these solvent molecules were removed by use of the utility SQUEEZE (Sluis and Spek, 1990) in PLATON98 (Spek, 1998). PLATON98 was used as incorporated in WinGX (Farrugia, 1999). Crystallographic data for **1** are presented in Table S1 and selected bond lengths and angles are given in Table S2. See <http://www.rsc.org/suppdata/cc/> for crystallographic data in CIF format (CCDC reference number 2529699).

**Ref.** (1) DENZO-SMN. (1997). Z. Otwinowski, W. Minor, *Methods in Enzymology*, 276: *Macromolecular Crystallography, Part A*, 307 – 326, C. W. J. Carter, M. I. Simon, R. M. Sweet, Editors, Academic Press.

(2) D. T. Cromer, J. T. Waber, *International Tables for X-Ray Crystallography*, Kynoch Press, Birmingham, vol. 4, 1974, Table 2.2A.

**Table S1.** Crystal data and structure refinement for **1**.

|         |                                                                                                                |
|---------|----------------------------------------------------------------------------------------------------------------|
|         | <b>1</b>                                                                                                       |
| Formula | C <sub>39</sub> H <sub>65</sub> Cd <sub>3</sub> Cl <sub>6</sub> Eu <sub>2</sub> N <sub>7</sub> O <sub>19</sub> |
| Fw      | 1789.80                                                                                                        |

|                                                         |                |
|---------------------------------------------------------|----------------|
| Crystal system                                          | Orthorhombic   |
| Space group                                             | Pbcn           |
| $a$ [Å]                                                 | 12.5924(11)    |
| $b$ [Å]                                                 | 29.4736(18)    |
| $c$ [Å]                                                 | 36.5786(13)    |
| $\alpha$ [deg]                                          | 90.00          |
| $\beta$ [deg]                                           | 90.00          |
| $\gamma$ [deg]                                          | 90.00          |
| $V$ [Å <sup>3</sup> ]                                   | 13575.9(15)    |
| $d$ [g/cm <sup>3</sup> ]                                | 1.751          |
| $Z$                                                     | 8              |
| $T$ [K]                                                 | 190(1)         |
| F(000)                                                  | 6976           |
| $\mu$ , mm <sup>-1</sup>                                | 3.044          |
| $\theta$ rang, deg                                      | 1.77-25.00     |
| reflns meads                                            | 11814          |
| reflns used                                             | 11814          |
| params                                                  | 687            |
| R1 <sup>a</sup> , wR2 <sup>a</sup> [ $I > 2\sigma(I)$ ] | 0.0903, 0.2220 |
| R1, wR2 (all data)                                      | 0.1778, 0.2474 |
| Quality of fit                                          | 1.046          |

<sup>a</sup>  $R1 = \frac{\sum |F_o| - |F_c|}{\sum |F_o|}$ ,  $wR2 = \frac{[\sum w[(F_o^2 - F_c^2)^2]/\sum [w(F_o^2)^2]]^{1/2}}{w}$ ,  $w=1/[\sigma^2(F_o^2)+(0.075P)^2]$ , where  $P = [\max(F_o^2, 0) + 2F_c^2]/3$ .

**Table S2.** Selected Bond Lengths (Å) and angles (°) for **1**.

|               |           |             |           |
|---------------|-----------|-------------|-----------|
| Eu(1)-O(13)   | 2.385(10) | Eu(1)-O(4)  | 2.480(11) |
| Eu(1)-O(14)   | 2.405(11) | Eu(1)-O(11) | 2.485(16) |
| Eu(1)-O(13)#1 | 2.426(11) | Eu(1)-O(19) | 2.491(19) |
| Eu(1)-O(9)    | 2.467(17) | Eu(1)-O(10) | 2.492(12) |

|                     |           |                     |          |
|---------------------|-----------|---------------------|----------|
| Eu(1)-O(5)          | 2.539(11) | O(11)-Eu(1)-O(19)   | 72.3(6)  |
| Eu(2)-O(17)         | 2.36(2)   | O(13)-Eu(1)-O(10)   | 84.7(4)  |
| Eu(2)-O(12)         | 2.385(17) | O(14)-Eu(1)-O(10)   | 138.6(4) |
| Eu(2)-O(15)         | 2.378(19) | O(13)#1-Eu(1)-O(10) | 71.3(4)  |
| Eu(2)-O(14)#1       | 2.403(12) | O(9)-Eu(1)-O(10)    | 78.3(5)  |
| Eu(2)-O(14)         | 2.424(10) | O(4)-Eu(1)-O(10)    | 127.6(4) |
| Eu(2)-O(13)         | 2.434(11) | O(11)-Eu(1)-O(10)   | 143.3(5) |
| Eu(2)-O(16)         | 2.440(18) | O(19)-Eu(1)-O(10)   | 74.6(6)  |
| Eu(2)-O(18)         | 2.57(2)   | O(13)-Eu(1)-O(5)    | 133.8(4) |
| Cd(1)-O(4)          | 2.272(13) | O(14)-Eu(1)-O(5)    | 107.8(4) |
| Cd(1)-Cl(6)         | 2.324(13) | O(13)#1-Eu(1)-O(5)  | 70.3(4)  |
| Cd(1)-N(1)          | 2.383(16) | O(9)-Eu(1)-O(5)     | 68.4(6)  |
| Cd(1)-Cl(1)         | 2.456(7)  | O(4)-Eu(1)-O(5)     | 62.9(4)  |
| Cd(1)-O(11)         | 2.477(14) | O(11)-Eu(1)-O(5)    | 123.8(4) |
| Cd(2)-O(5)          | 2.216(12) | O(19)-Eu(1)-O(5)    | 126.2(5) |
| Cd(2)-Cl(3)         | 2.370(8)  | O(10)-Eu(1)-O(5)    | 66.6(4)  |
| Cd(2)-N(4)          | 2.401(17) | O(17)-Eu(2)-O(12)   | 142.1(7) |
| Cd(2)-Cl(2)         | 2.426(10) | O(17)-Eu(2)-O(15)   | 77.2(8)  |
| Cd(2)-O(10)         | 2.511(12) | O(12)-Eu(2)-O(15)   | 113.2(6) |
| Cd(3)-N(2)          | 2.283(15) | O(17)-Eu(2)-O(14)#1 | 76.0(7)  |
| Cd(3)-N(3)          | 2.327(16) | O(12)-Eu(2)-O(14)#1 | 139.6(4) |
| Cd(3)-Cl(4)         | 2.373(10) | O(15)-Eu(2)-O(14)#1 | 82.5(6)  |
| Cd(3)-Cl(5)#2       | 2.557(8)  | O(17)-Eu(2)-O(14)   | 139.3(7) |
| Cd(3)-Cl(5)         | 2.571(9)  | O(12)-Eu(2)-O(14)   | 78.2(5)  |
| O(13)-Eu(1)-O(14)   | 70.5(4)   | O(15)-Eu(2)-O(14)   | 80.0(5)  |
| O(13)-Eu(1)-O(13)#1 | 66.5(5)   | O(14)#1-Eu(2)-O(14) | 67.9(4)  |
| O(14)-Eu(1)-O(13)#1 | 68.6(4)   | O(17)-Eu(2)-O(13)   | 114.3(7) |
| O(13)-Eu(1)-O(9)    | 141.8(5)  | O(12)-Eu(2)-O(13)   | 79.7(5)  |
| O(14)-Eu(1)-O(9)    | 140.2(5)  | O(15)-Eu(2)-O(13)   | 143.7(6) |
| O(13)#1-Eu(1)-O(9)  | 135.7(5)  | O(14)#1-Eu(2)-O(13) | 68.5(4)  |
| O(13)-Eu(1)-O(4)    | 142.7(4)  | O(14)-Eu(2)-O(13)   | 69.4(4)  |
| O(14)-Eu(1)-O(4)    | 72.4(4)   | O(17)-Eu(2)-O(16)   | 74.6(8)  |
| O(13)#1-Eu(1)-O(4)  | 103.3(4)  | O(12)-Eu(2)-O(16)   | 76.2(6)  |
| O(9)-Eu(1)-O(4)     | 71.2(5)   | O(15)-Eu(2)-O(16)   | 140.6(6) |
| O(13)-Eu(1)-O(11)   | 101.0(4)  | O(14)#1-Eu(2)-O(16) | 116.0(5) |
| O(14)-Eu(1)-O(11)   | 75.6(5)   | O(14)-Eu(2)-O(16)   | 138.4(5) |
| O(13)#1-Eu(1)-O(11) | 144.2(4)  | O(13)-Eu(2)-O(16)   | 74.2(5)  |
| O(9)-Eu(1)-O(11)    | 75.2(5)   | O(17)-Eu(2)-O(18)   | 75.5(8)  |
| O(4)-Eu(1)-O(11)    | 65.5(4)   | O(12)-Eu(2)-O(18)   | 73.8(6)  |
| O(13)-Eu(1)-O(19)   | 74.4(5)   | O(15)-Eu(2)-O(18)   | 72.2(7)  |
| O(14)-Eu(1)-O(19)   | 125.9(5)  | O(14)#1-Eu(2)-O(18) | 145.2(5) |
| O(13)#1-Eu(1)-O(19) | 129.5(5)  | O(14)-Eu(2)-O(18)   | 127.8(6) |
| O(9)-Eu(1)-O(19)    | 68.3(6)   | O(13)-Eu(2)-O(18)   | 142.9(6) |
| O(4)-Eu(1)-O(19)    | 127.0(5)  | O(16)-Eu(2)-O(18)   | 74.5(7)  |

|                   |          |                     |          |
|-------------------|----------|---------------------|----------|
| O(4)-Cd(1)-Cl(6)  | 129.9(5) | N(4)-Cd(2)-Cl(2)    | 99.3(5)  |
| O(4)-Cd(1)-N(1)   | 69.3(5)  | O(5)-Cd(2)-O(10)    | 71.2(4)  |
| Cl(6)-Cd(1)-N(1)  | 99.3(5)  | Cl(3)-Cd(2)-O(10)   | 103.5(4) |
| O(4)-Cd(1)-Cl(1)  | 104.0(4) | N(4)-Cd(2)-O(10)    | 138.9(5) |
| Cl(6)-Cd(1)-Cl(1) | 125.5(4) | Cl(2)-Cd(2)-O(10)   | 91.4(4)  |
| N(1)-Cd(1)-Cl(1)  | 107.6(4) | N(2)-Cd(3)-N(3)     | 72.8(5)  |
| O(4)-Cd(1)-O(11)  | 68.7(5)  | N(2)-Cd(3)-Cl(4)    | 108.8(5) |
| Cl(6)-Cd(1)-O(11) | 100.6(5) | N(3)-Cd(3)-Cl(4)    | 103.5(5) |
| N(1)-Cd(1)-O(11)  | 137.1(5) | N(2)-Cd(3)-Cl(5)#2  | 142.5(5) |
| Cl(1)-Cd(1)-O(11) | 90.8(4)  | N(3)-Cd(3)-Cl(5)#2  | 90.8(4)  |
| O(5)-Cd(2)-Cl(3)  | 137.9(5) | Cl(4)-Cd(3)-Cl(5)#2 | 107.8(4) |
| O(5)-Cd(2)-N(4)   | 67.7(5)  | N(2)-Cd(3)-Cl(5)    | 92.8(5)  |
| Cl(3)-Cd(2)-N(4)  | 106.9(5) | N(3)-Cd(3)-Cl(5)    | 148.6(5) |
| O(5)-Cd(2)-Cl(2)  | 106.0(4) | Cl(4)-Cd(3)-Cl(5)   | 107.5(4) |
| Cl(3)-Cd(2)-Cl(2) | 116.0(4) | Cl(5)#2-Cd(3)-Cl(5) | 84.1(3)  |

---
